# Supplementary material for: Pb2+removal based on the confinement effect in polygonal carbon nanotubes: a molecular dynamics simulation
Source: Royal Society of Chemistry journal article supplement (doi:10.1039/d2cp04880a), 2023-01-01
Supplement: d2cp04880a1.pdf [file d2cp04880a1.pdf]

## Supporting Information

### **Pb<sup>2+</sup> Removal Based on Confinement Effect in Polygonal Carbon**

#### **Nanotube: A Molecular Dynamics Simulation**

Zhiguo Yan, <sup>a</sup> Jieqing Liu, <sup>a</sup> Ling Huang, <sup>a,\*</sup> Heqing Fu <sup>b</sup>

<sup>a</sup> Key Laboratory of Green Chemical Process of Ministry of Education, Key Laboratory of Novel Reactor and Green Chemical Technology of Hubei Province, School of Chemical Engineering and Pharmacy, Wuhan Institute of Technology, Wuhan 430205, P.R. China.

<sup>b</sup> School of Chemistry and Chemical Engineering, South China University of Technology, Guangzhou 510641, P.R. China.

\* Corresponding author, email: [huangl0905@wit.edu.cn](mailto:huangl0905@wit.edu.cn)

Supporting information includes:

**Table S1.** Force field parameters of atoms involved in this work.

**Table S2.** The trajectory of each Pb<sup>2+</sup> ion (No.1~No.5) in 4N, 5N, 6N, 8N, 4F, 5F, 6F and 8F, respectively.

**Table S3.** Presentation of hydrogen-bonding network versus the time.

**Figure S1.** Representative initial configurations of 4F, 5F, 6F and 8F. (a)~(d) represents 4-, 5-, 6-, 8-CNT in the z-direction, and (e)~(h) represents 4-, 5-, 6-, 8-CNT in the y-direction, respectively

**Figure S2.** Pore size distributions (PSDs) of PCNTs calculated by zeo<sup>++</sup>.

**Figure S3.** RDF plots of H<sub>3</sub>O<sup>+</sup> in PCNTs/G without Pb<sup>2+</sup>.

**Figure S4.** RDF plots of H<sub>3</sub>O<sup>+</sup> in fluorinated PCNTs/G without Pb<sup>2+</sup>.

**Figure S5.** Side (upper) and top (lower) views of hydrogen-bonding representation. (a)~(d) represents 4N, 5N, 6N and 8N, and (e)~(h) represents 4F, 5F, 6F and 8F. (i) and (j) represents the hydrogen-bonding network containing Pb<sup>2+</sup> in 8N and 8F, respectively. Where grey, red, white, blue, yellow and pink respectively represents carbon, oxygen, hydrogen, O<sub>2</sub> hydronium, fluorine and Pb<sup>2+</sup>.

**Table S1.** Force field parameters for atoms involved in this work.

| Atom                               | $\epsilon_{ij}$ (kcal/mol) | $\sigma$ (Å) | Charge( e ) | Ref. |
|------------------------------------|----------------------------|--------------|-------------|------|
| C                                  | 0.105                      | 3.851        | 0.00        | 1, 2 |
| C <sub>C-F</sub>                   | 0.105                      | 3.851        | +0.109      | 1, 2 |
| F                                  | 0.069                      | 3.08         | -0.109      | 3    |
| O <sub>tip</sub> _H <sub>2</sub> O | 0.184                      | 3.553        | -0.82       | 4, 5 |
| H <sub>tip</sub> _H <sub>2</sub> O | 0.010                      | 0.900        | +0.41       | 4, 5 |
| O*_H <sub>3</sub> O <sup>+</sup>   | 0.184                      | 3.553        | -0.38       | 4, 5 |
| H*_H <sub>3</sub> O <sup>+</sup>   | 0.010                      | 0.900        | +0.46       | 4, 5 |
| Pb <sup>2+</sup>                   | 0.663                      | 4.297        | +2.00       | 6    |

**Table S2.** The trajectory of each  $\text{Pb}^{2+}$  ion (No.1~No.5) in 4N, 5N, 6N, 8N, 4F, 5F, 6F and 8F, respectively.

|    | $\text{Pb}^{2+}$ -No.1                                                              | $\text{Pb}^{2+}$ -No.2                                                              | $\text{Pb}^{2+}$ -No.3                                                              | $\text{Pb}^{2+}$ -No.4                                                               | $\text{Pb}^{2+}$ -No.5                                                                |
|----|-------------------------------------------------------------------------------------|-------------------------------------------------------------------------------------|-------------------------------------------------------------------------------------|--------------------------------------------------------------------------------------|---------------------------------------------------------------------------------------|
| 4N | 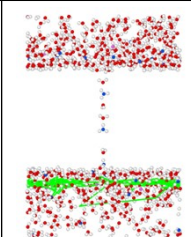   |    |    |    |    |
| 5N |    |    |    |    |    |
| 6N |   |   |   |   |   |
| 8N |  |  |  |  |  |
| 4F |  |  |  |  |  |
| 5F |  |  |  |  |  |

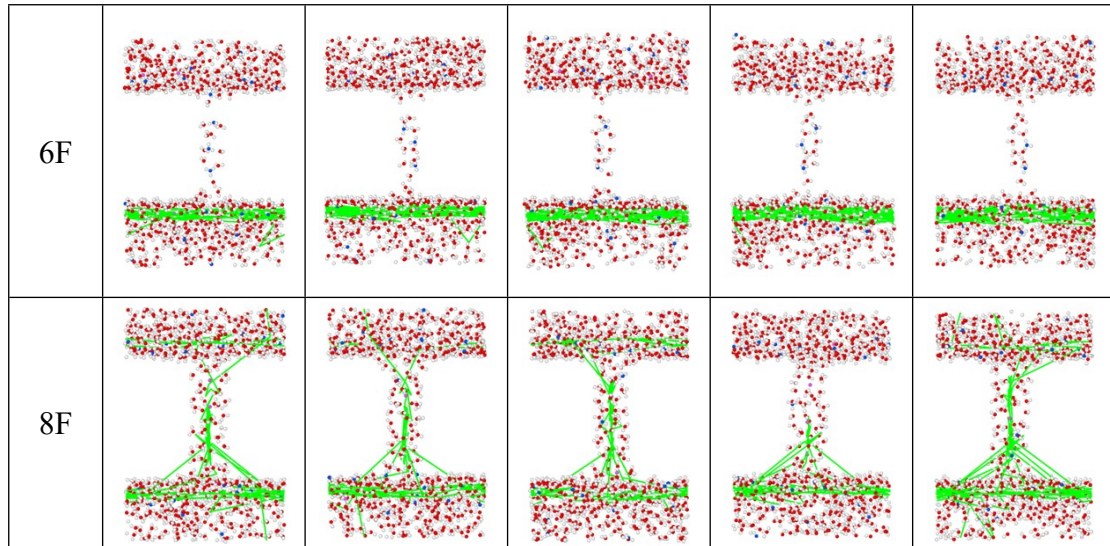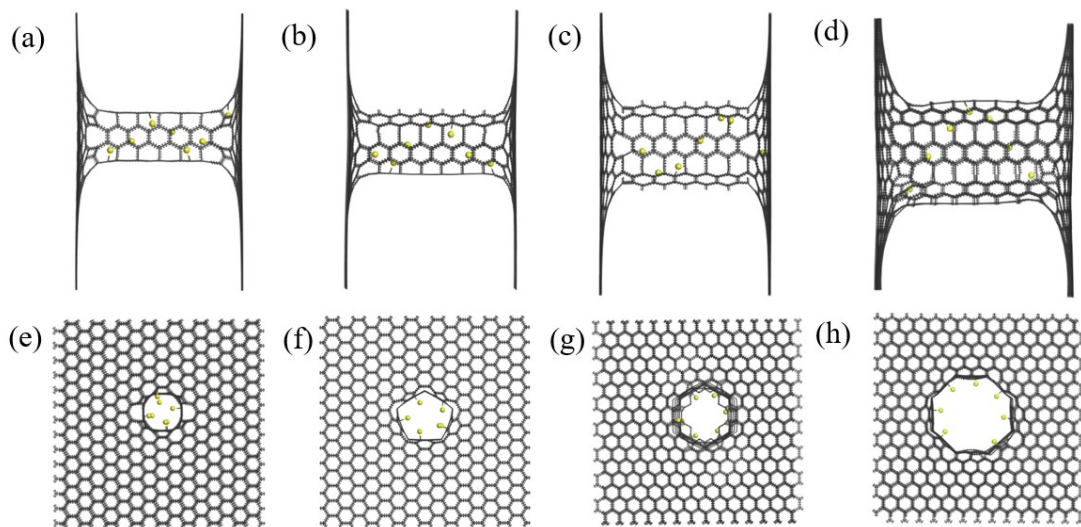

**Figure S1.** Representative initial configurations of 4F, 5F, 6F and 8F. (a)~(d) represents 4-, 5-, 6-, 8-CNT in the z-direction, and (e)~(h) represents 4-, 5-, 6-, 8-CNT in the y-direction, respectively.

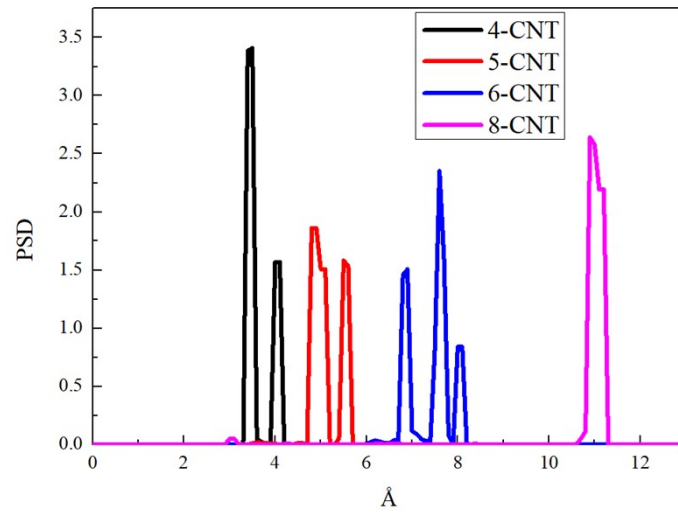

**Figure S2.** Pore size distributions (PSDs) of PCNTs calculated by zeo<sup>++</sup>.<sup>7</sup>

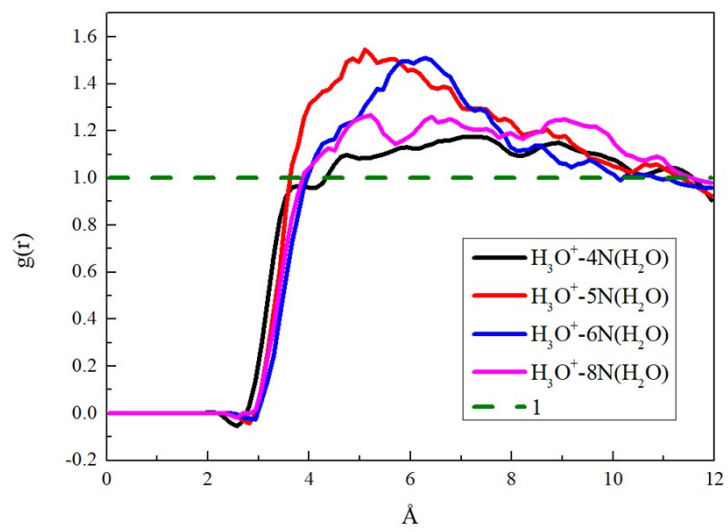

**Figure S3.** RDF plots of  $\text{H}_3\text{O}^+$  in PCNTs/G without  $\text{Pb}^{2+}$ .

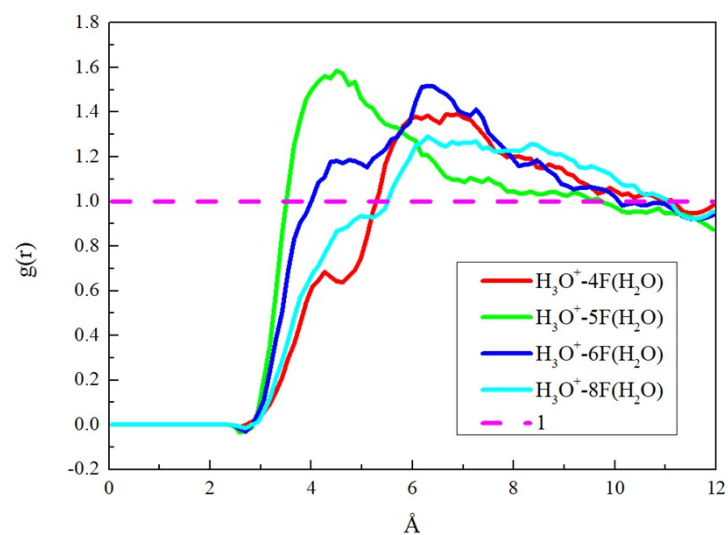

**Figure S4.** RDF plots of  $\text{H}_3\text{O}^+$  in fluorinated PCNTs/G without  $\text{Pb}^{2+}$ .

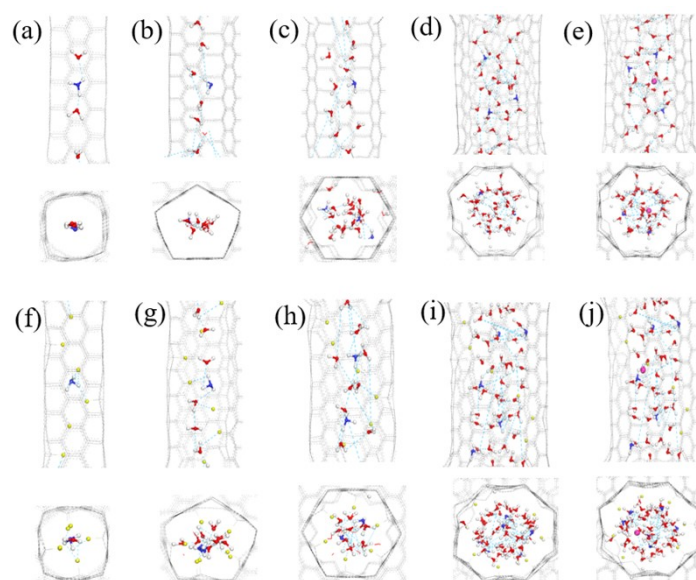

**Figure S5.** Side (upper) and top (lower) views of hydrogen-bonding representation. (a)~(d) represents 4N, 5N, 6N and 8N, and (e)~(h) represents 4F, 5F, 6F and 8F. (i) and (j) represents the hydrogen-bonding network containing  $\text{Pb}^{2+}$  in 8N and 8F, respectively. Where grey, red, white, blue, yellow and pink respectively represents carbon, oxygen, hydrogen, O\_hydronium, fluorine and  $\text{Pb}^{2+}$ .

**Table S3.** Presentation of hydrogen-bonding network versus the time.

|       | 2 ns                                                                                | 4 ns                                                                                | 6 ns                                                                                | 8 ns                                                                                | 10 ns                                                                               | 12 ns                                                                               | 14 ns                                                                                | 16 ns                                                                                 | 18 ns                                                                                 | 20 ns                                                                                 |
|-------|-------------------------------------------------------------------------------------|-------------------------------------------------------------------------------------|-------------------------------------------------------------------------------------|-------------------------------------------------------------------------------------|-------------------------------------------------------------------------------------|-------------------------------------------------------------------------------------|--------------------------------------------------------------------------------------|---------------------------------------------------------------------------------------|---------------------------------------------------------------------------------------|---------------------------------------------------------------------------------------|
| 4N    | 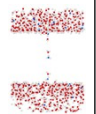   |    |    |    |    |    |    |    |    |    |
| 5N    |    |    |    |    |    |    |    |    |    |    |
| 6N    |    |    |    |    |    |    |    |    |    |    |
| 8N    |    |    |    |    |    |    |    |    |    |    |
| 4N-Pb |    |    |    |    |    |    |    |    |    |    |
| 5N-Pb |   |   |   |   |   |   |   |   |   |   |
| 6N-Pb |  |  |  |  |  |  |  |  |  |  |
| 8N-Pb |  |  |  |  |  |  |  |  |  |  |
| 4F-Pb |  |  |  |  |  |  |  |  |  |  |
| 5F-Pb |  |  |  |  |  |  |  |  |  |  |
| 6F-Pb |  |  |  |  |  |  |  |  |  |  |
| 8F-Pb |  |  |  |  |  |  |  |  |  |  |

## References

1. K. Moriguchi and A. Shintani, *Jpn. J. Appl. Phys*, 1998, **37**, 414-422.
2. J. Tersoff, *Phys Rev B*, 1989, **39**, 5566-5568.
3. S. Shi, L. Yan, Y. Yang, J. Fisher-Shaulsky and T. Thacher, *J. Comput. Chem*, 2003, **24**, 1059 –1076.
4. P. Mark and L. Nilsson, *J. Phys. Chem. A*, 2001, **105** 9954-9960.
5. W. L. Jorgensen, J. Chandrasekhar, J. D. Madura, R. W. Impey and M. L. Klein, *J. Chem. Phys*, 1983, **79**, 926-935.
6. S. S. M. Khadem, A. Nasiriasayesh and A. H. Mashhadzadeh, *J. Nanostruct. Chem.*, 2021, **12**, 291-305.
7. M. Haranczyk, C.H. Rycroft, T.F. Willems, R.L. Martin, Zeo++. Available at <http://www.zeoplusplus.org/> (Jun 20th 2017).
